# Supplementary material
Source: PubMed Central journal article supplement (PMC8034990)

**S4****A**

IgG

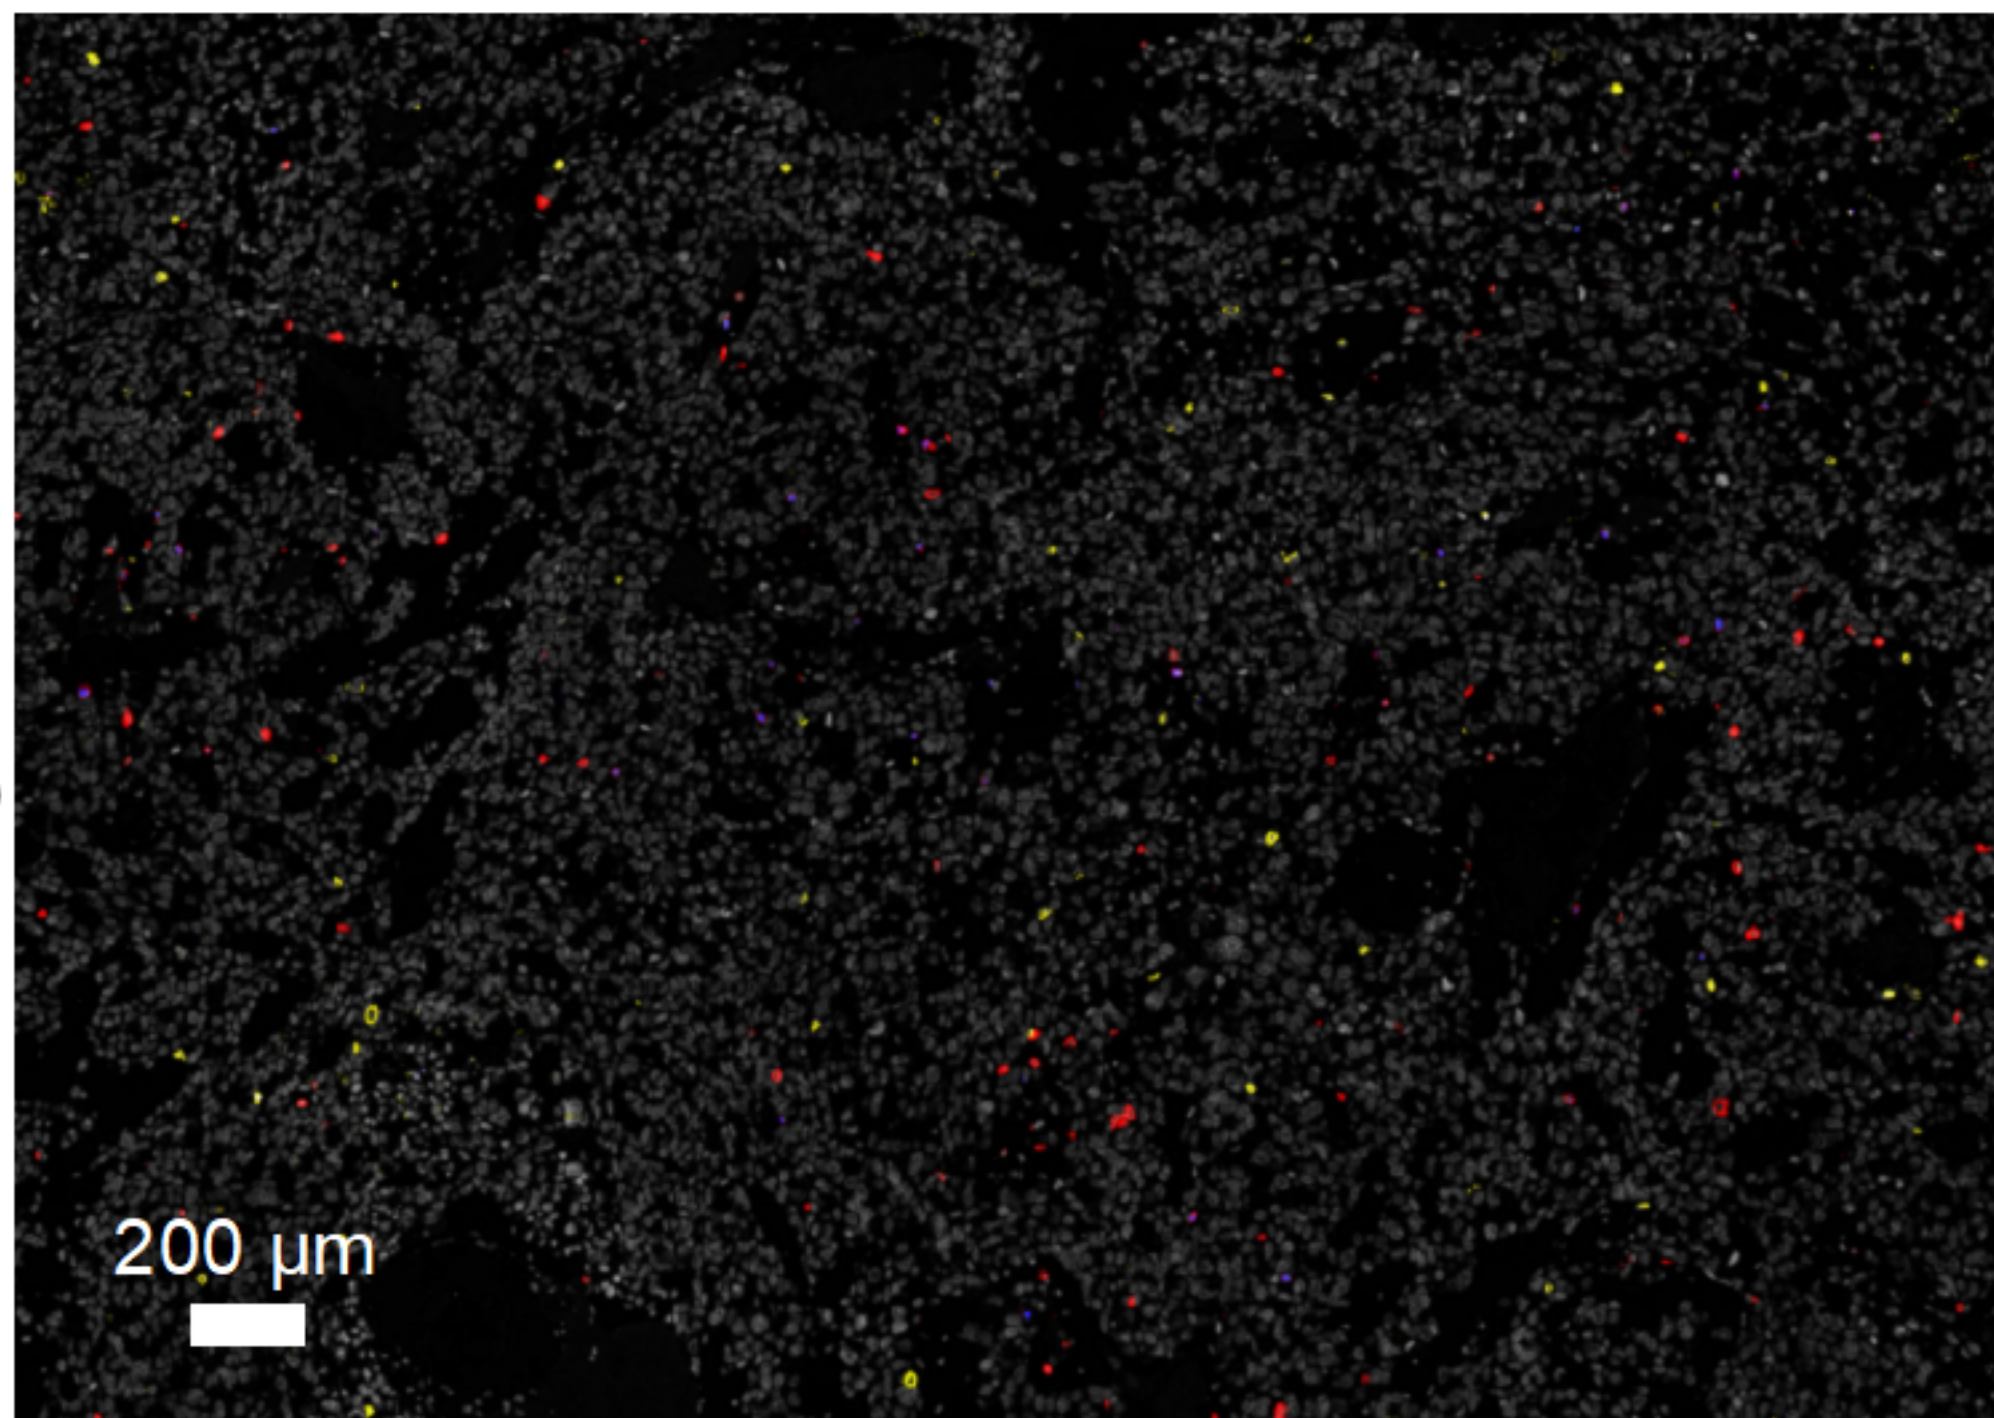

Dex

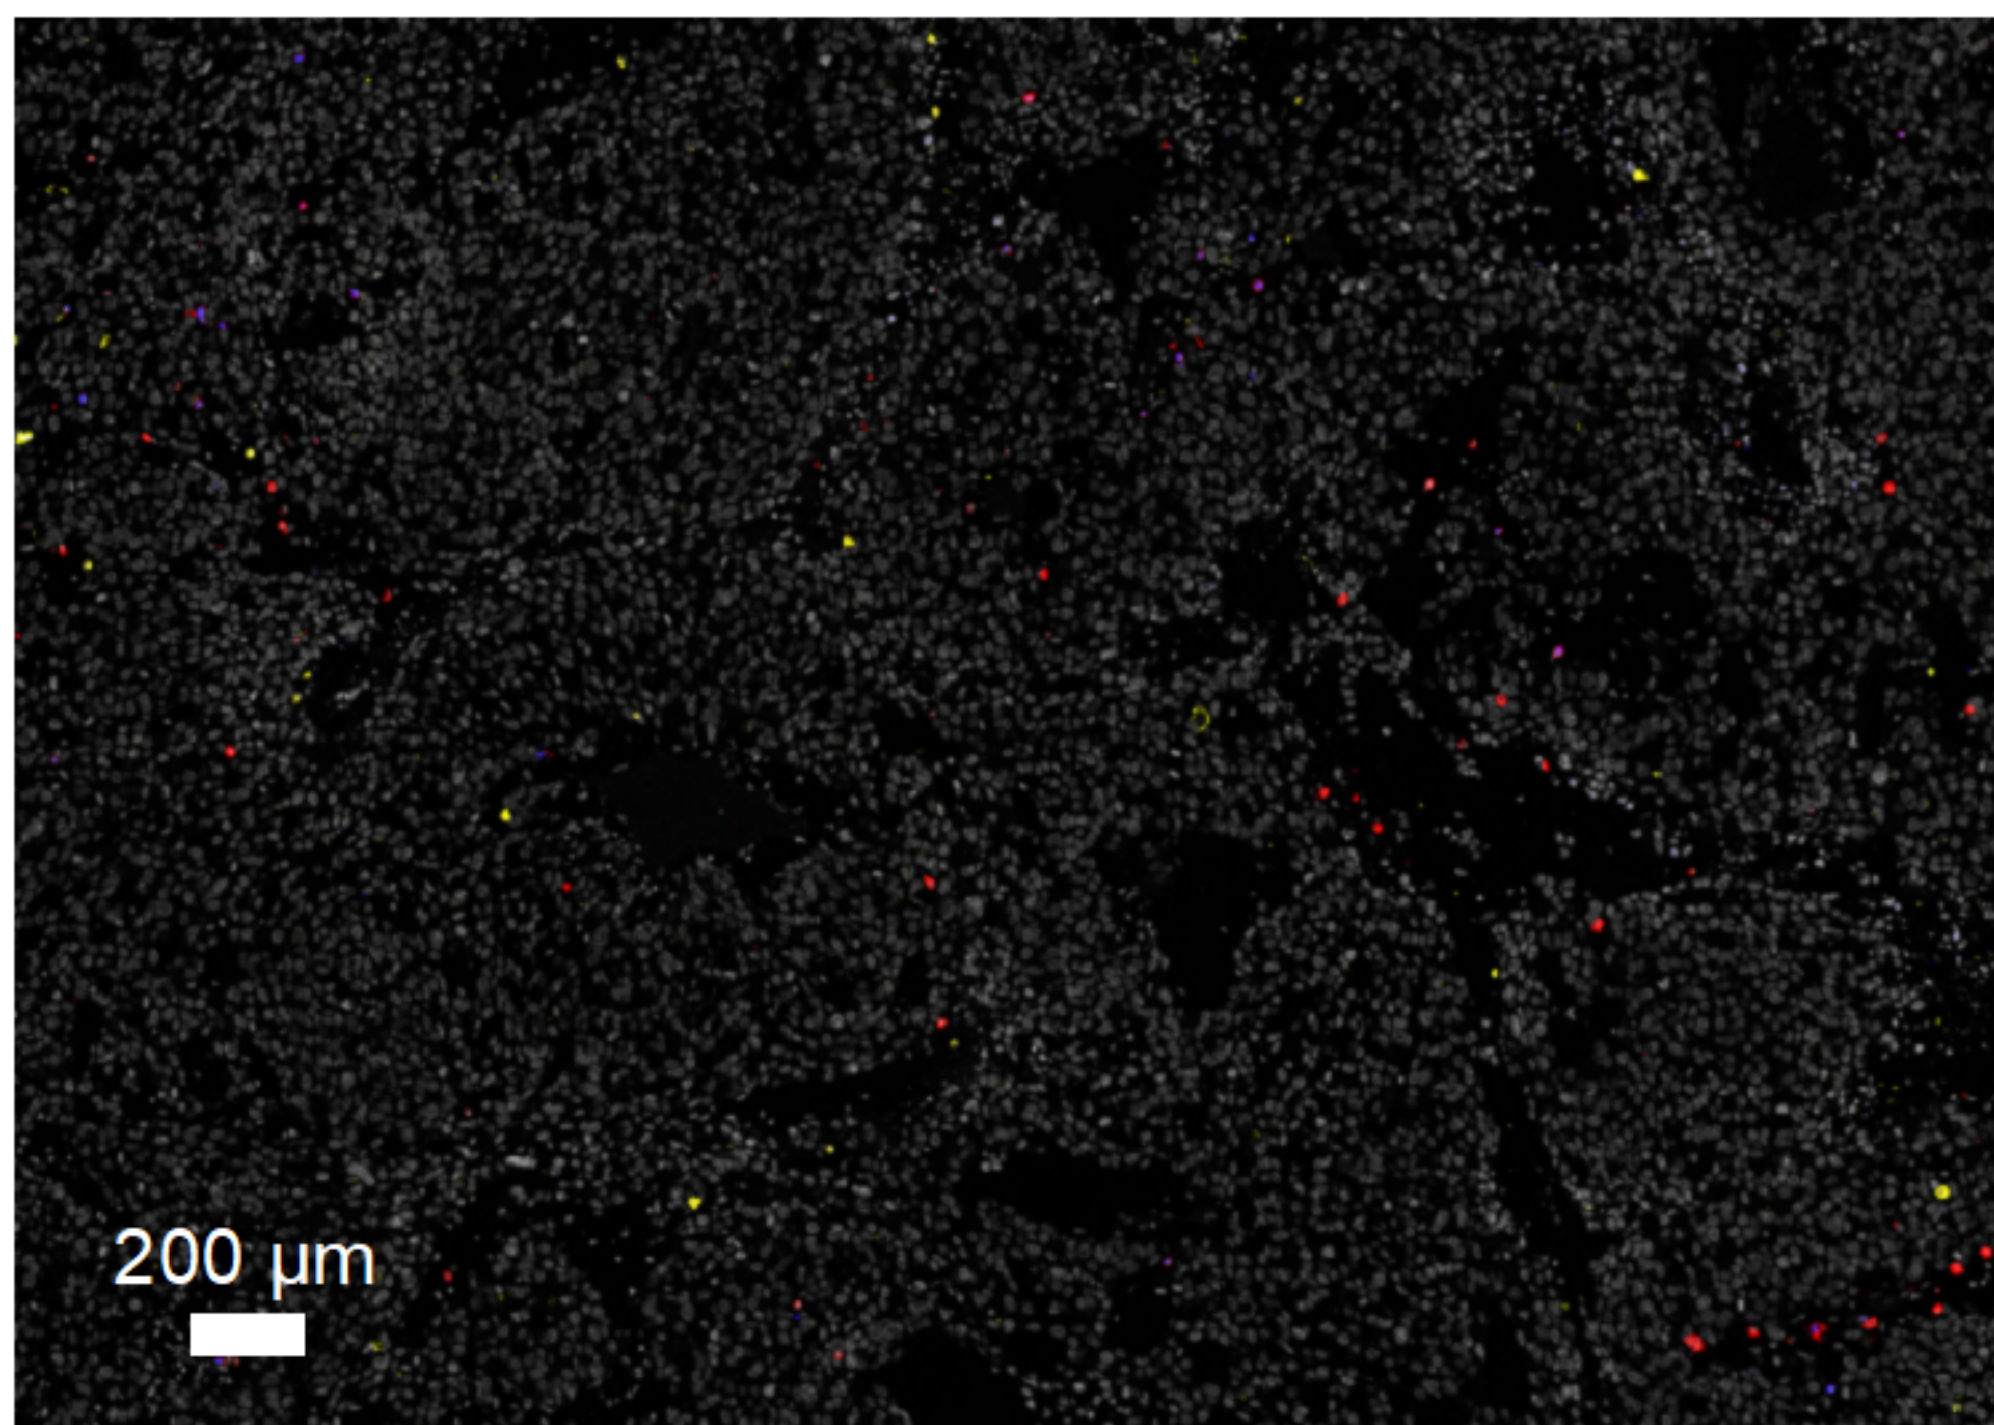

CD4  
CD8 $\alpha$   
FOXP3  
DNA

**B**

CD4+ FOXP3- T cell

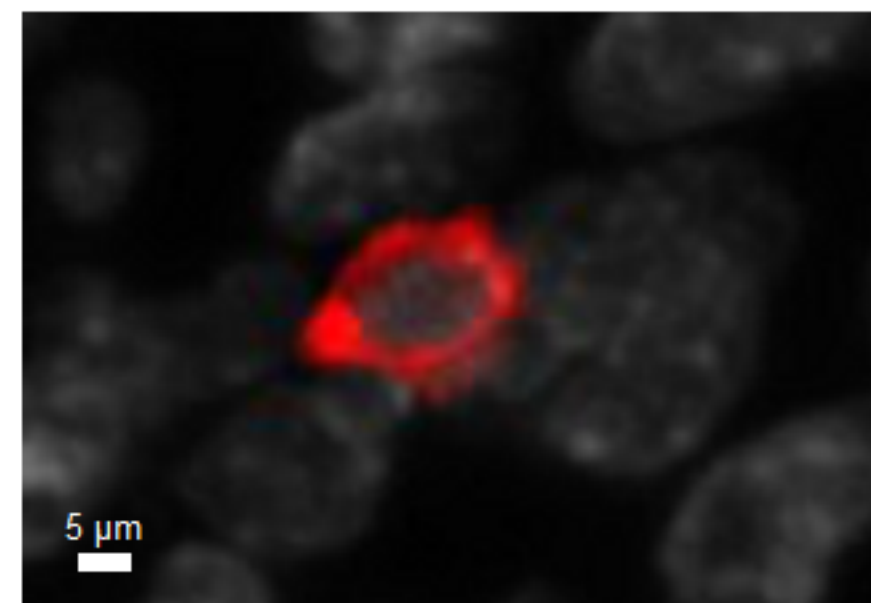

CD8+ T cell

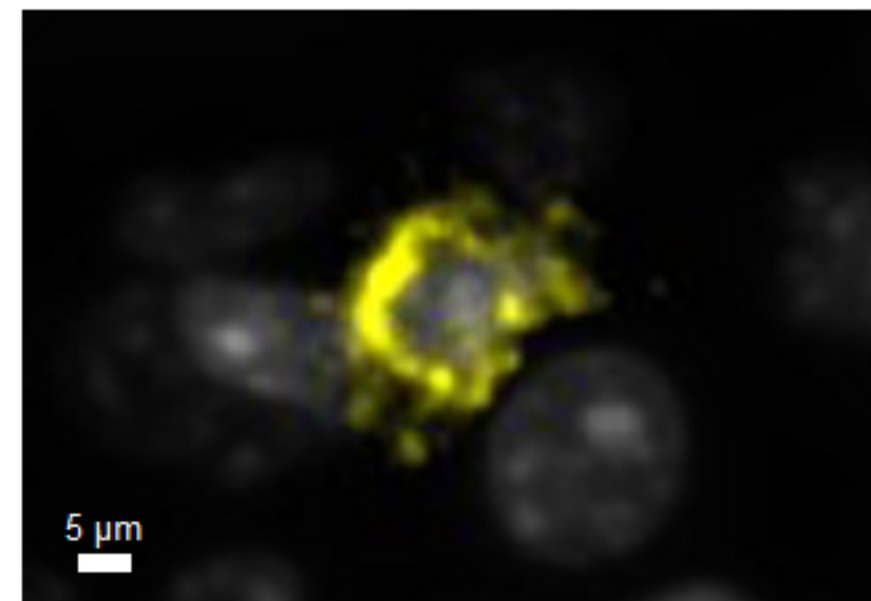

CD4+ FOXP3+ T cell

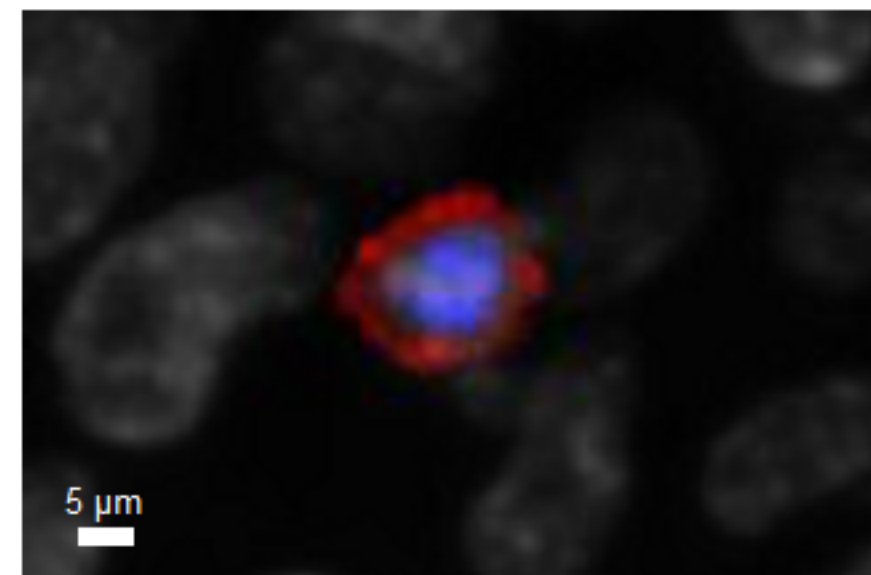**C**

CD4+ FOXP3- T cells

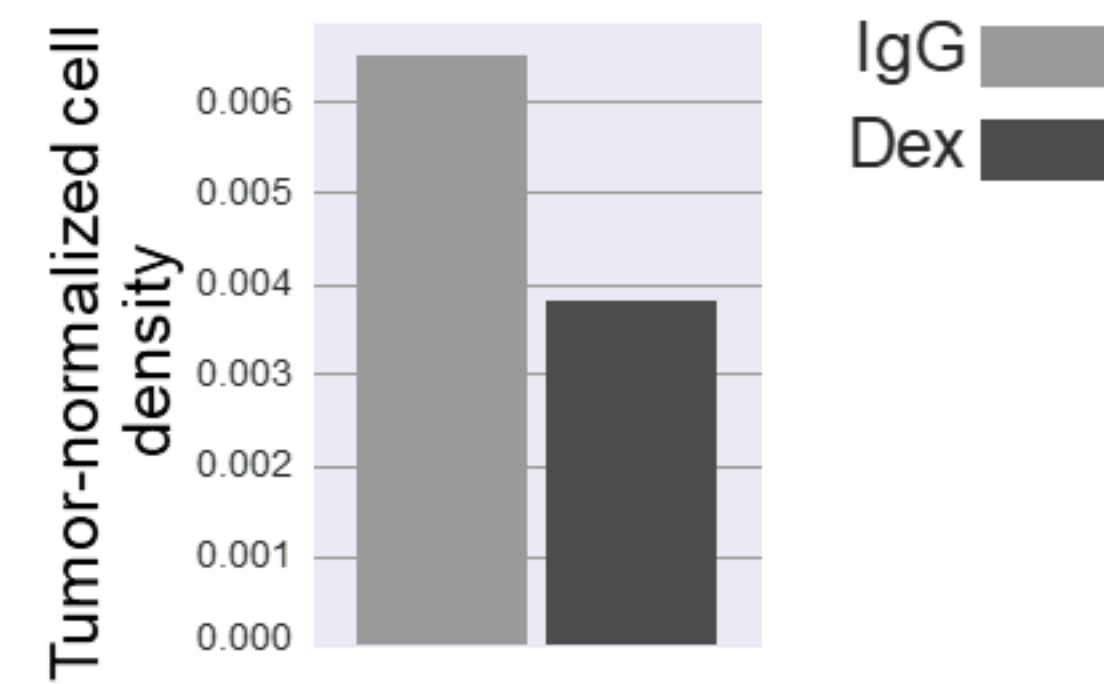

CD8+ T cells

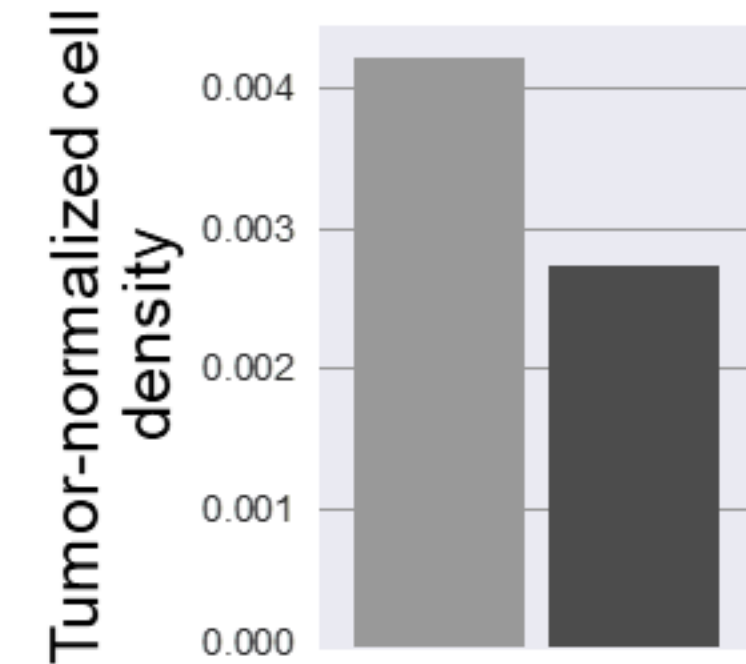

CD4+ FOXP3+ T cells

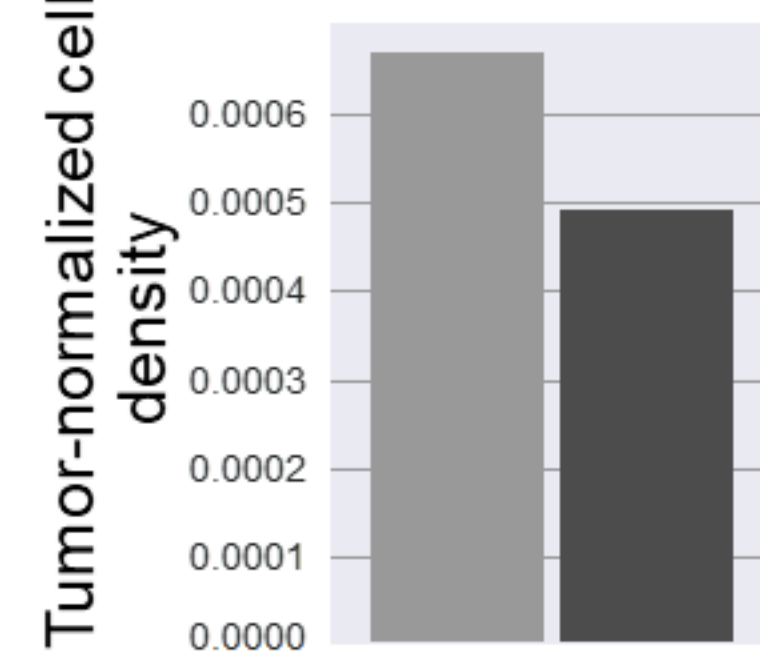

Supplement: NIHMS1638220-supplement-4.pdf [file NIHMS1638220-supplement-4.pdf]
