# Supplementary material
Source: PubMed Central journal article supplement (PMC8034990)
Supplement: NIHMS1638220-supplement-6.pdf [file NIHMS1638220-supplement-6.pdf]

**Concurrent Dexamethasone Limits the Clinical Benefit of Immune Checkpoint Blockade in Glioblastoma**

**Supplemental Table S1.**

|                                                                          | Overall                 | Dexamethasone at $\alpha$ PD-(L)1 initiation |                          |                          |
|--------------------------------------------------------------------------|-------------------------|----------------------------------------------|--------------------------|--------------------------|
|                                                                          |                         | None                                         | <2mg daily               | $\geq$ 2mg daily         |
| n                                                                        | 181                     | 117                                          | 29                       | 35                       |
| IDH-wildtype                                                             | 181                     | 117                                          | 29                       | 35                       |
| Age at diagnosis, yr (median, IQR)                                       | 57.5<br>(50.3-64.6)     | 57.4<br>(51.4-64.2)                          | 58.3<br>(47.8-67.3)      | 57.5<br>(51.6-65.5)      |
| Sex                                                                      |                         |                                              |                          |                          |
| Female                                                                   | 79                      | 52                                           | 13                       | 14                       |
| Male                                                                     | 102                     | 65                                           | 16                       | 21                       |
| Disease setting                                                          |                         |                                              |                          |                          |
| Recurrent                                                                | 137                     | 84                                           | 24                       | 29                       |
| Newly-diagnosed                                                          | 44                      | 33                                           | 5                        | 6                        |
| <i>MGMT</i> promoter methylation status                                  |                         |                                              |                          |                          |
| Unmethylated                                                             | 97                      | 64                                           | 15                       | 18                       |
| Methylated                                                               | 59                      | 37                                           | 8                        | 14                       |
| Partially methylated                                                     | 14                      | 9                                            | 3                        | 2                        |
| n/a                                                                      | 11                      | 7                                            | 3                        | 1                        |
| KPS at initiation of $\alpha$ PD-(L)1                                    |                         |                                              |                          |                          |
| $\leq$ 70                                                                | 31                      | 12                                           | 11                       | 8                        |
| 80                                                                       | 56                      | 36                                           | 8                        | 12                       |
| $\geq$ 90                                                                | 88                      | 65                                           | 9                        | 14                       |
| n/a                                                                      | 6                       | 4                                            | 1                        | 1                        |
| GTR prior to $\alpha$ PD-(L)1                                            |                         |                                              |                          |                          |
| Yes                                                                      | 80                      | 56                                           | 10                       | 14                       |
| No                                                                       | 99                      | 60                                           | 18                       | 21                       |
| n/a                                                                      | 2                       | 1                                            | 1                        | 0                        |
| Tumor volume at start of $\alpha$ PD-(L)1, mm <sup>3</sup> (median, IQR) | 8,112<br>(4,094-15,604) | 6,528<br>(2,382-11,100)                      | 11,481<br>(6,206-26,973) | 13,796<br>(5,883-25,675) |
| $\alpha$ PD-(L)1 agents*                                                 |                         |                                              |                          |                          |
| Pembrolizumab                                                            | 76                      | 49                                           | 14                       | 13                       |
| Nivolumab                                                                | 72                      | 45                                           | 11                       | 16                       |
| Durvalumab                                                               | 29                      | 20                                           | 3                        | 6                        |
| Cemiplimab                                                               | 5                       | 3                                            | 1                        | 1                        |
| Atezolizumab                                                             | 1                       | 1                                            | 0                        | 0                        |
| Concurrent systemic therapy                                              |                         |                                              |                          |                          |
| Yes                                                                      | 118                     | 70                                           | 21                       | 27                       |
| No                                                                       | 36                      | 29                                           | 4                        | 3                        |

\*2 patients received multiple  $\alpha$ PD-(L)1 agents concurrently.  $\alpha$ PD-(L)1 that was received as part of a clinical trial, included: NCT02336165 (n=29), NCT02337491 (26), NCT02017717 (19), NCT03661723

(16), NCT02054806 (12), NCT02852655 (12), NCT02327078 (8), NCT03452579 (6), NCT03491683 (5),  
NCT01460134 (4), NCT03576612 (4), NCT02311920 (3), NCT02658981 (3), NCT03636477 (3),  
NCT02526017 (1), NCT02667587 (1), NCT03637764 (1), NCT02335918 (1).
