# Supplementary material
Source: PubMed Central journal article supplement (PMC8034990)

# S1 A

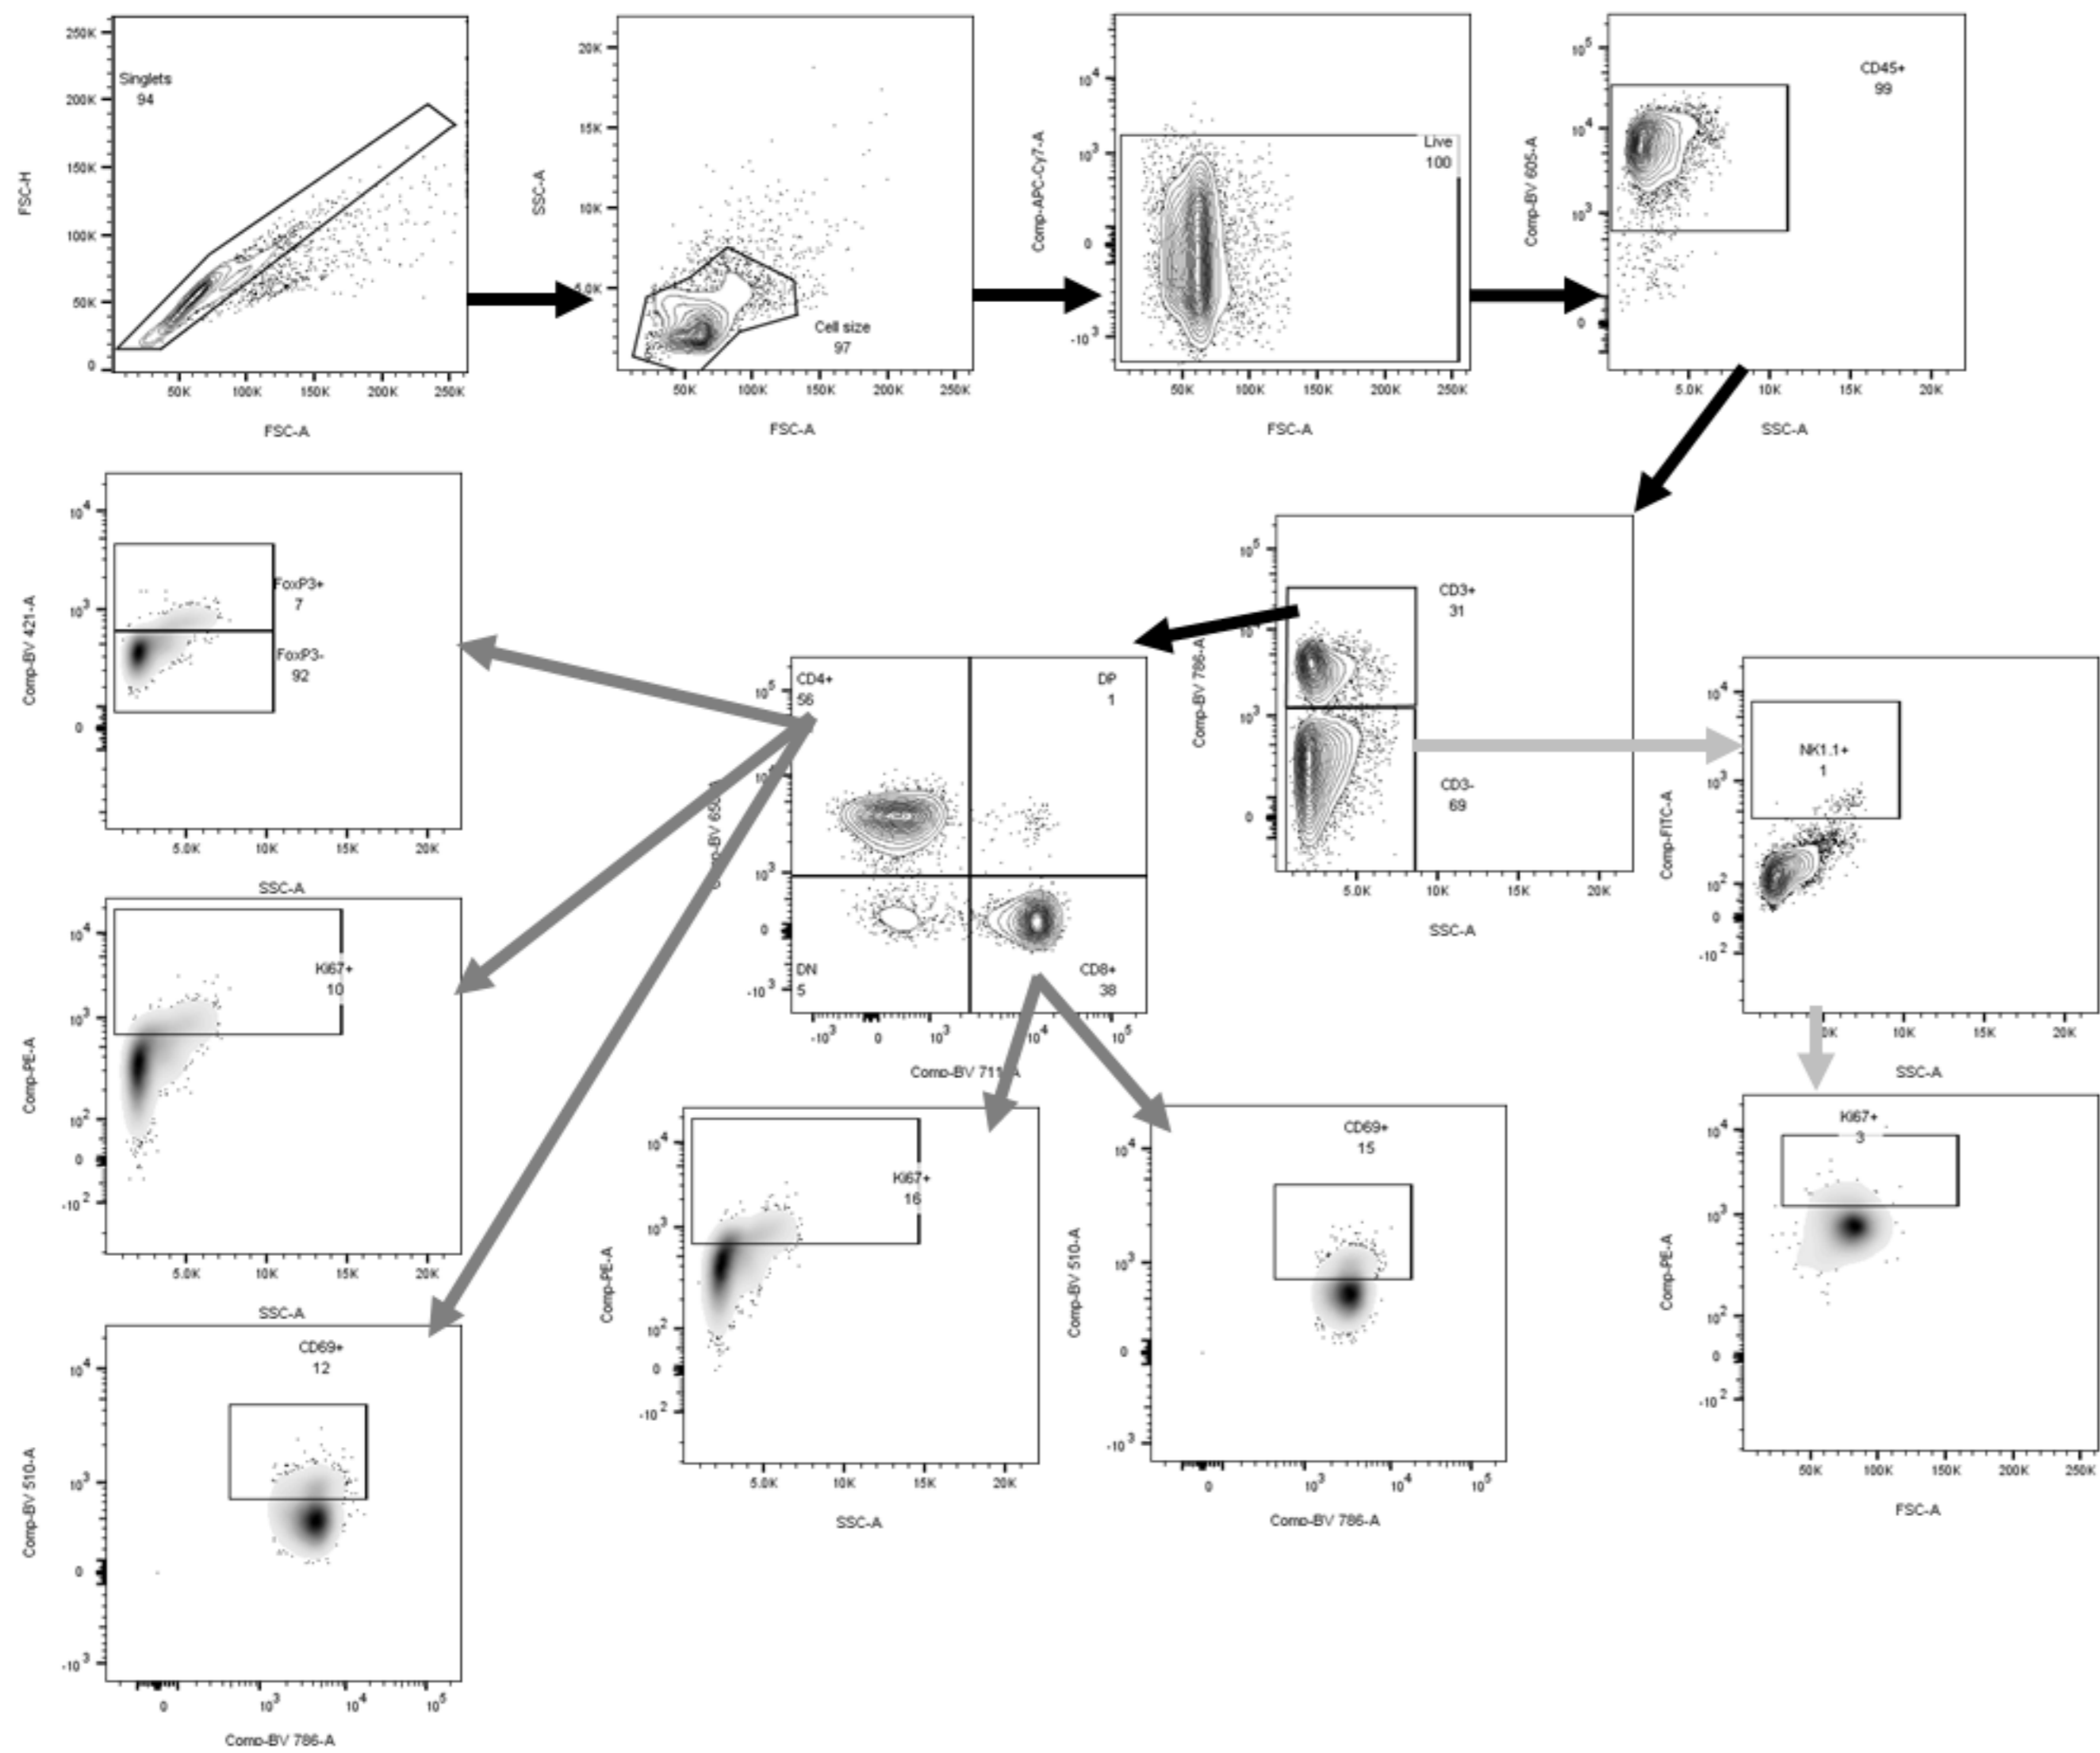

# B

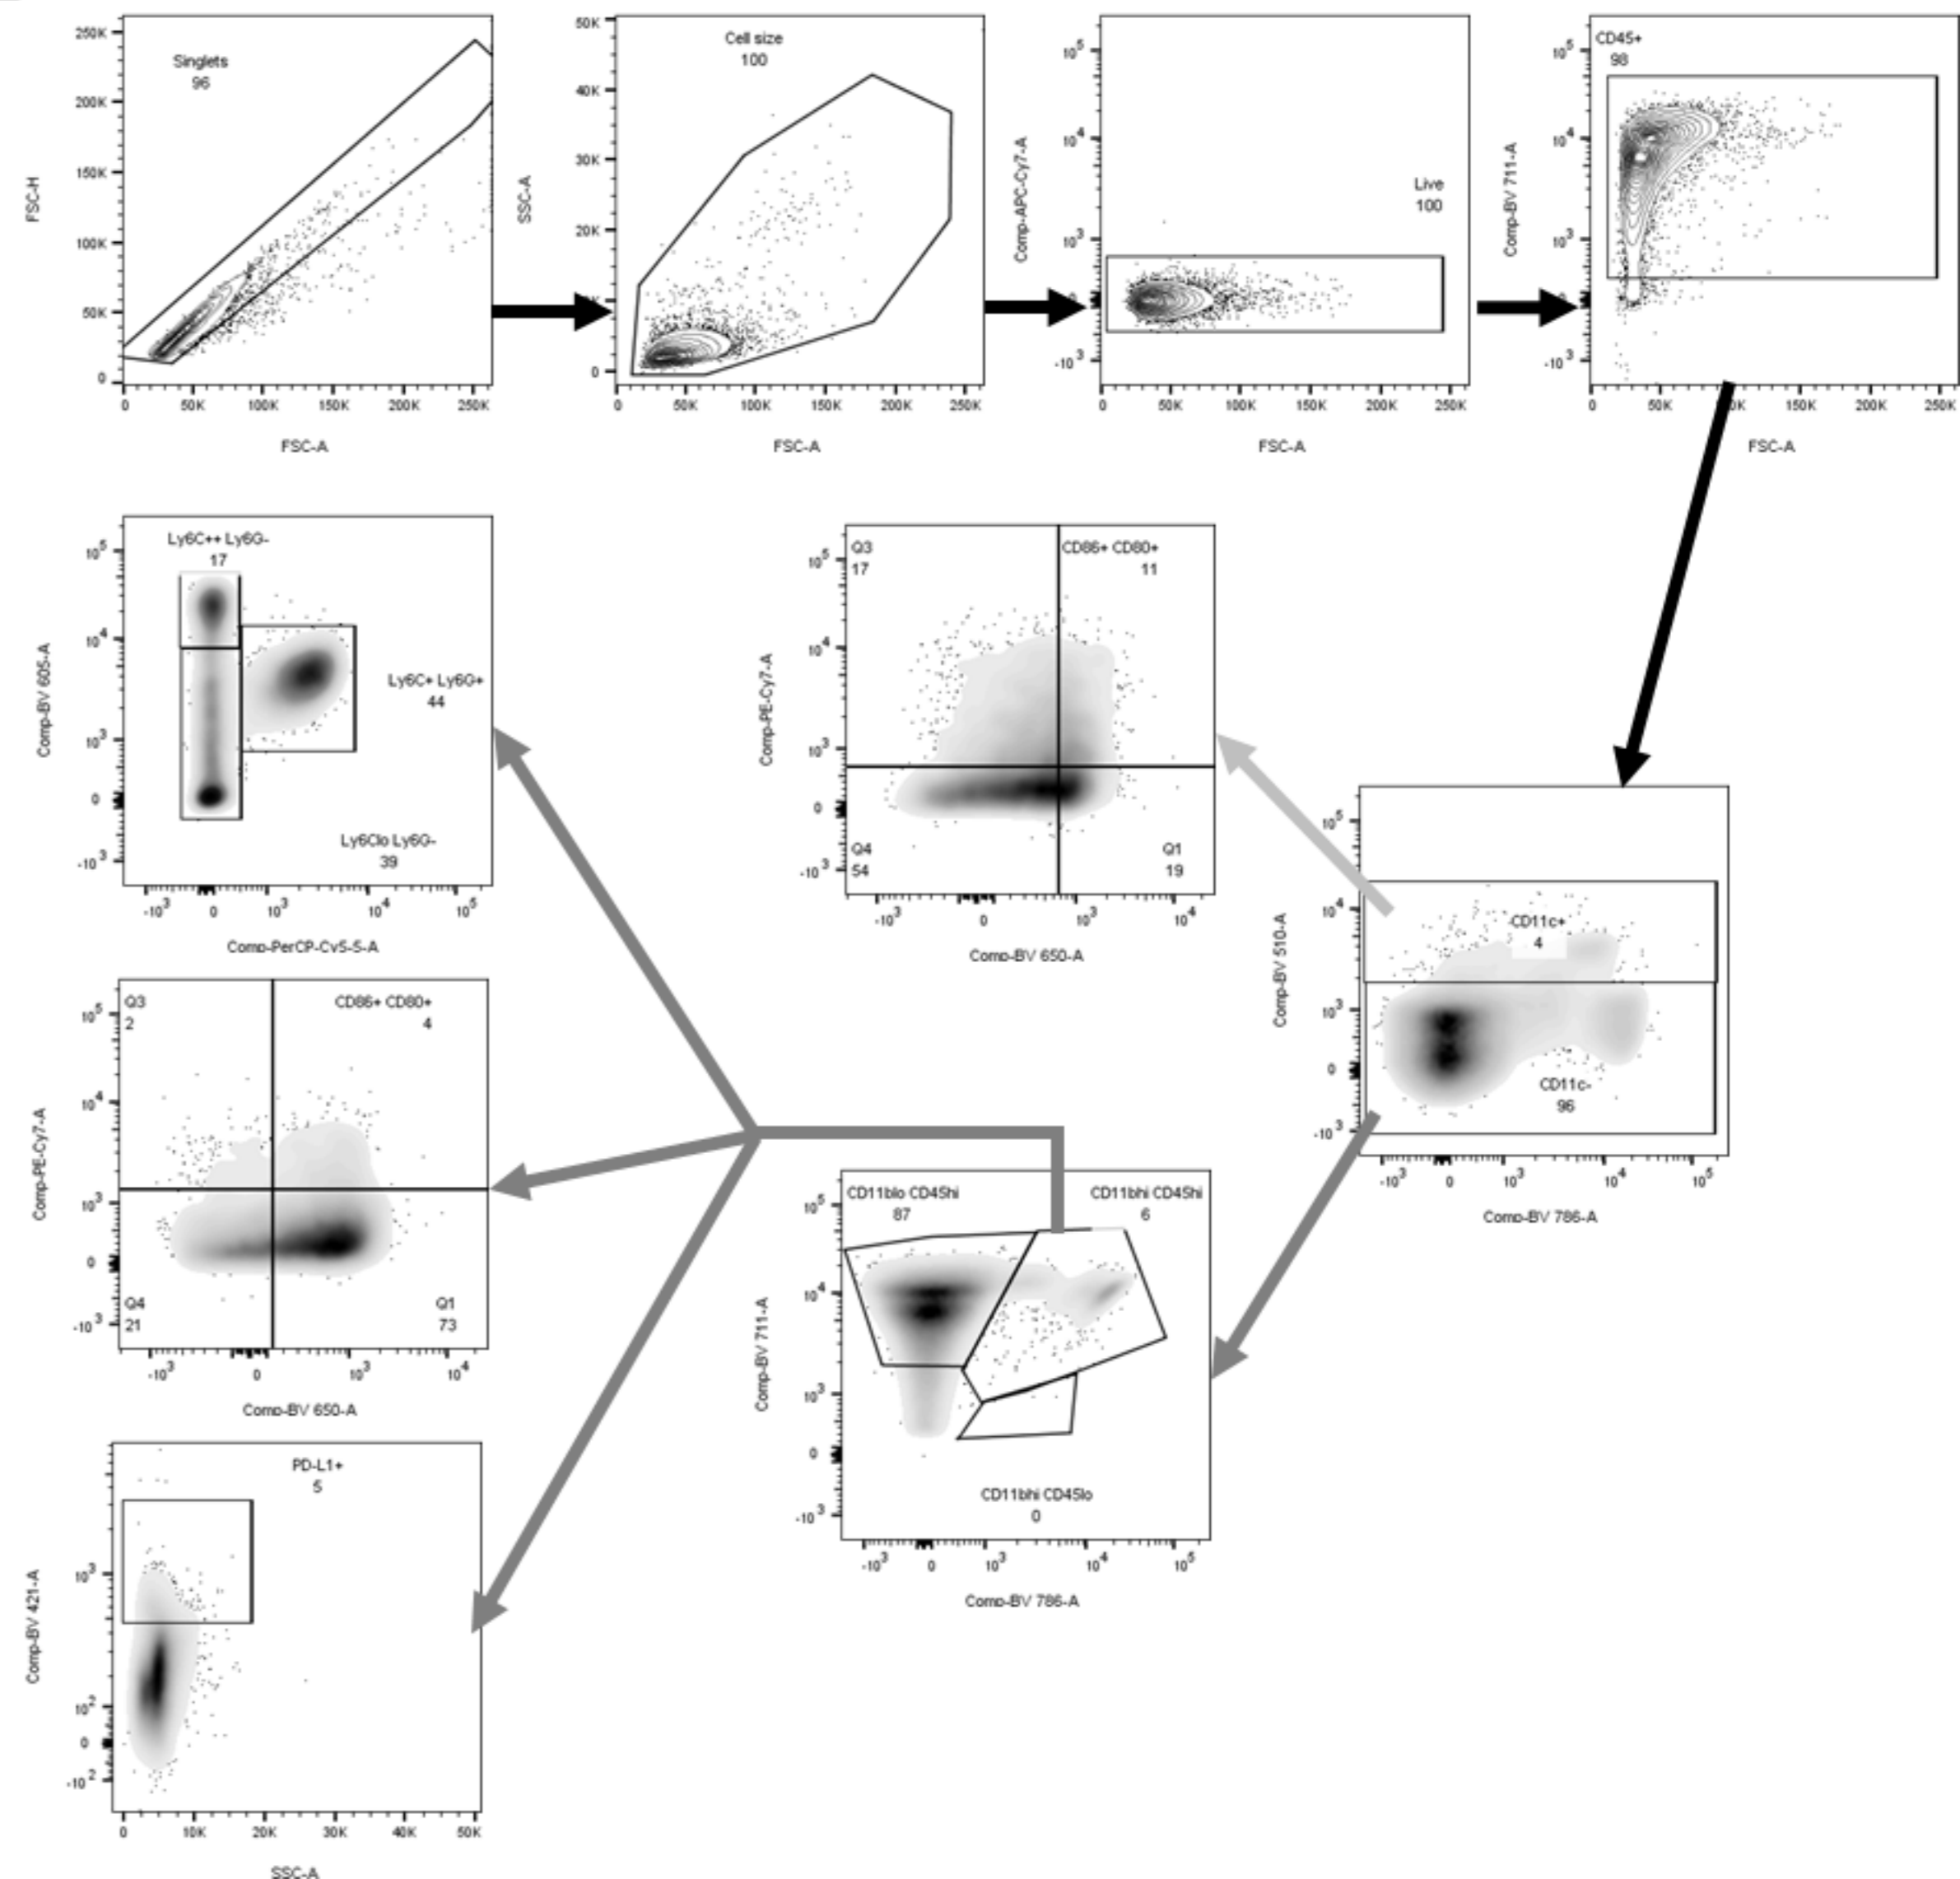

Supplement: NIHMS1638220-supplement-1.pdf [file NIHMS1638220-supplement-1.pdf]

# S2 A

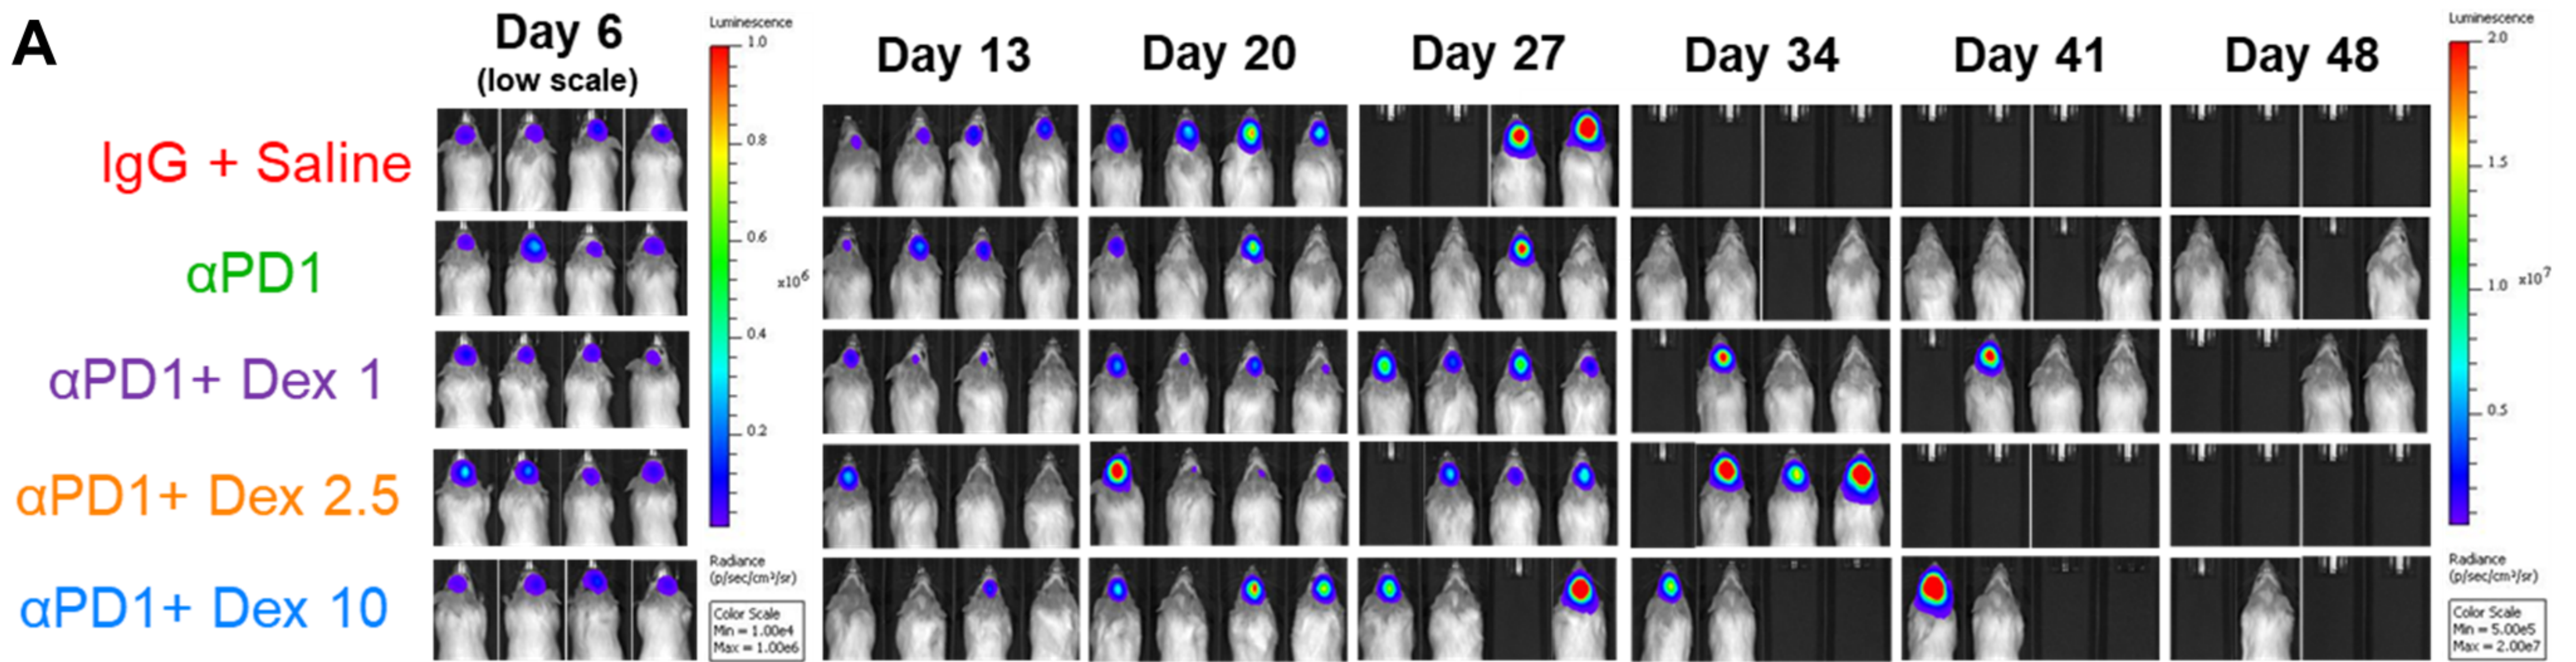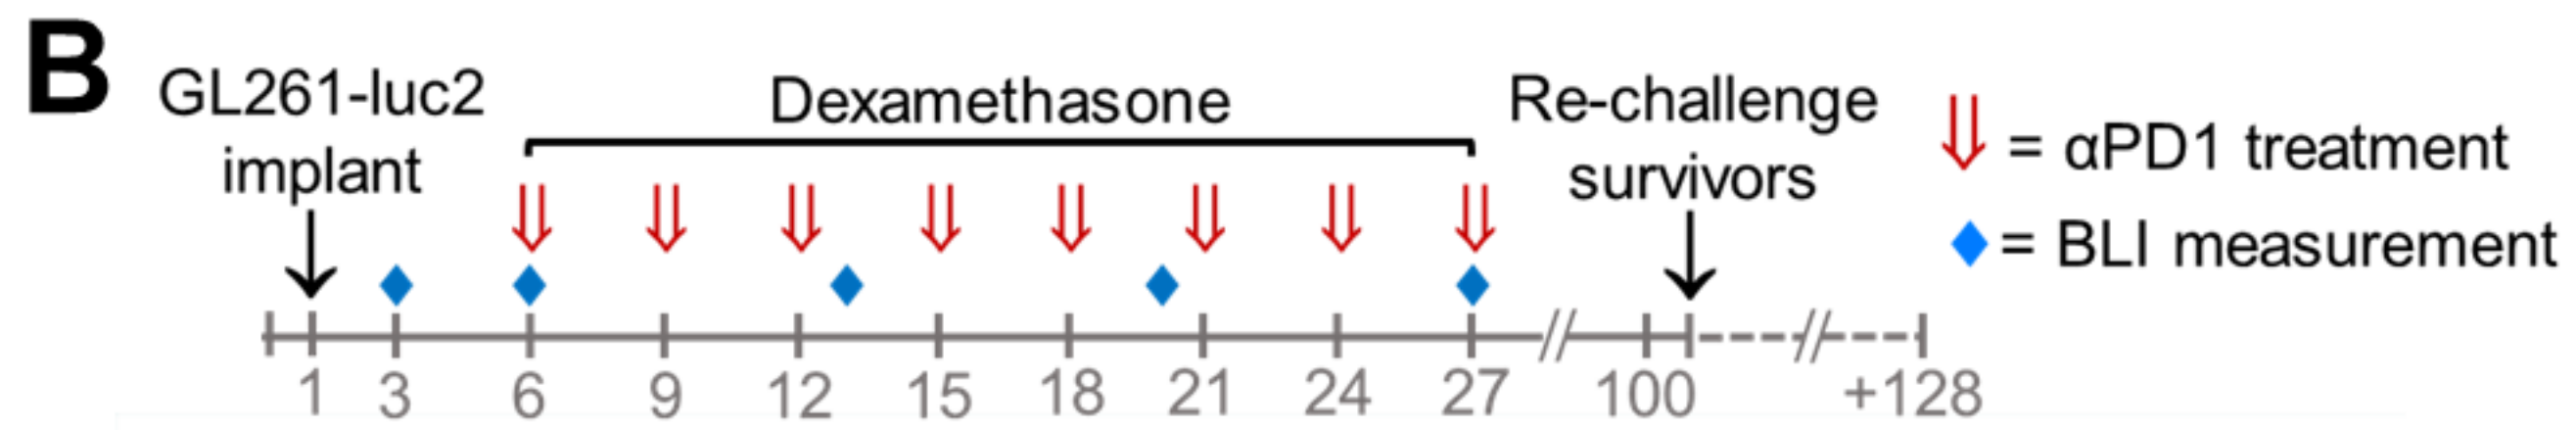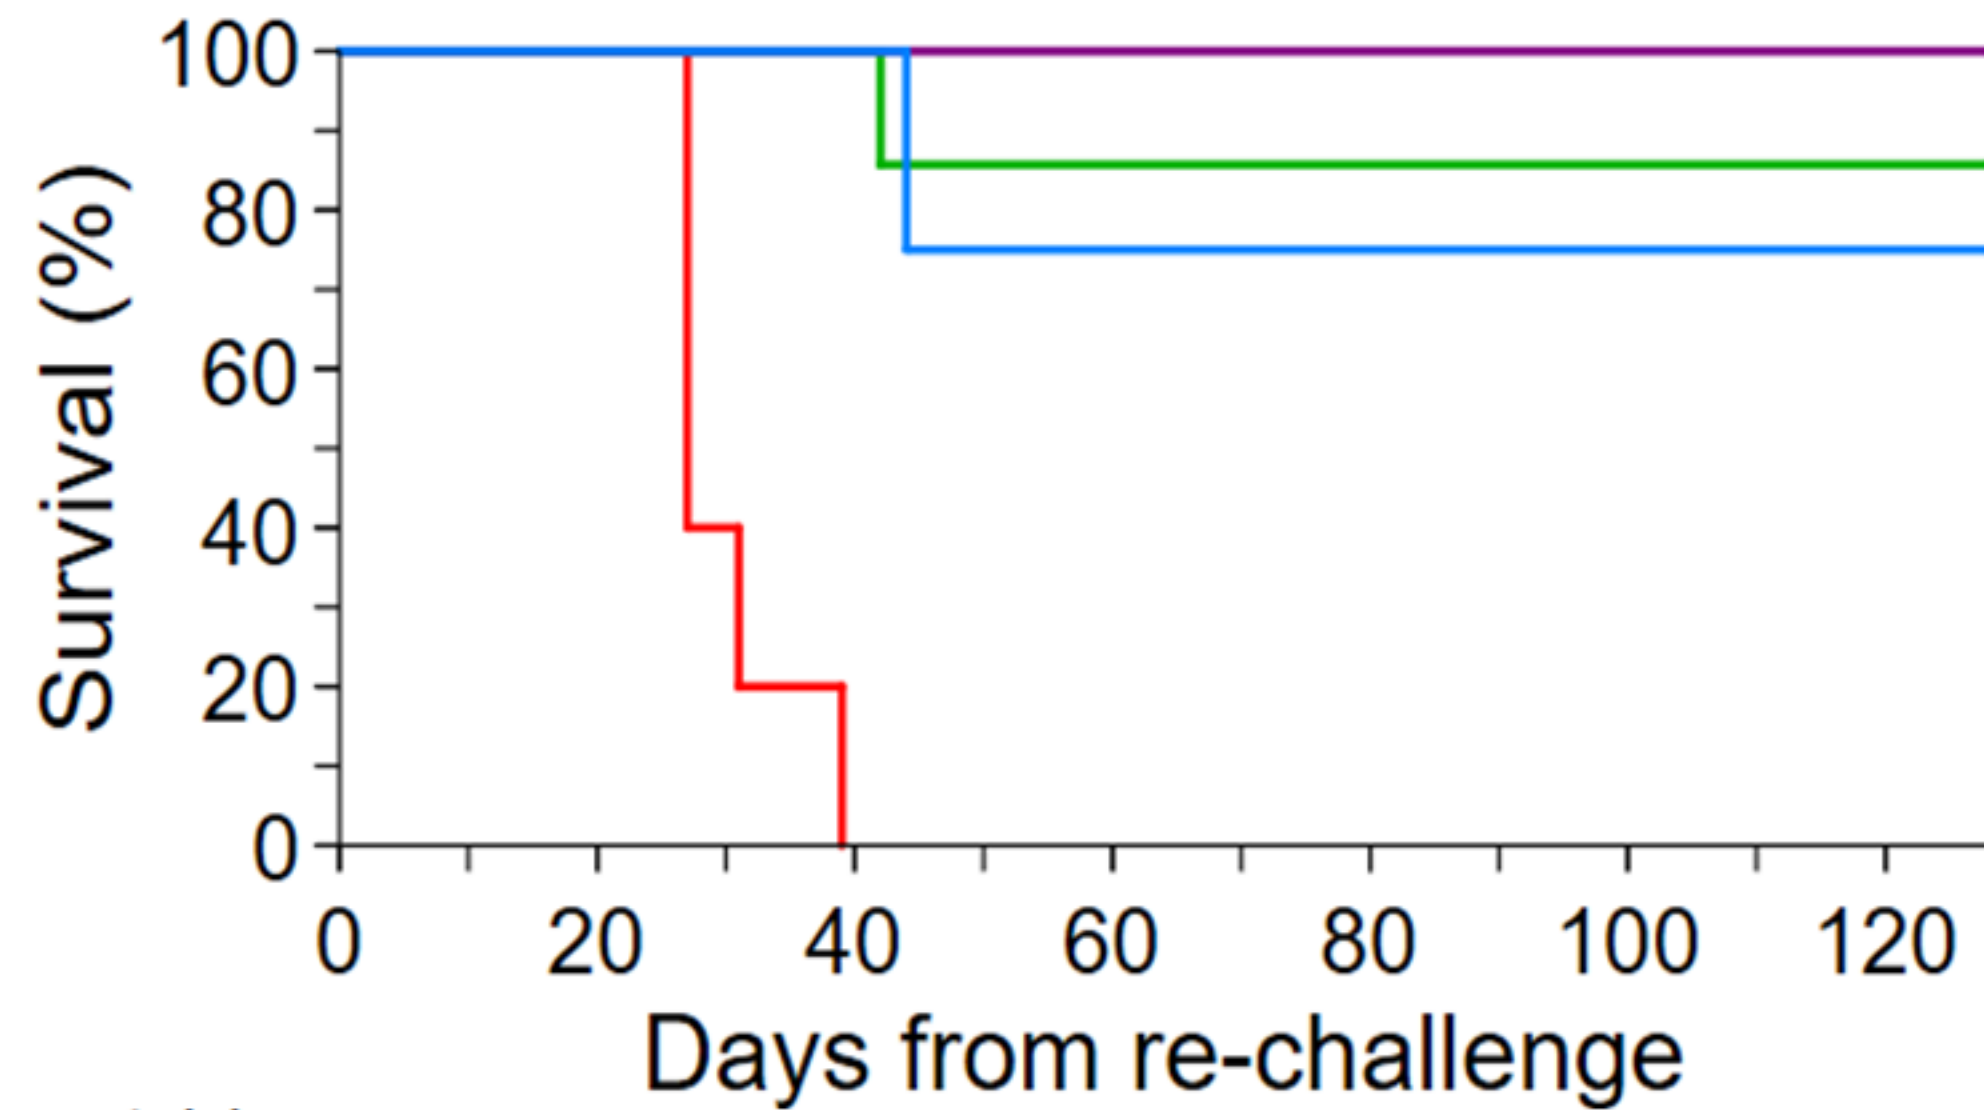

|                   | 5 | 5 | 0 | 0 | 0 | 0 | 0 |
|-------------------|---|---|---|---|---|---|---|
| Naïve             | 5 | 5 | 0 | 0 | 0 | 0 | 0 |
| Prior αPD1        | 7 | 7 | 7 | 6 | 6 | 6 | 6 |
| Prior αPD1+Dex 1  | 5 | 5 | 5 | 5 | 5 | 5 | 5 |
| Prior αPD1+Dex 10 | 4 | 4 | 4 | 3 | 3 | 3 | 3 |

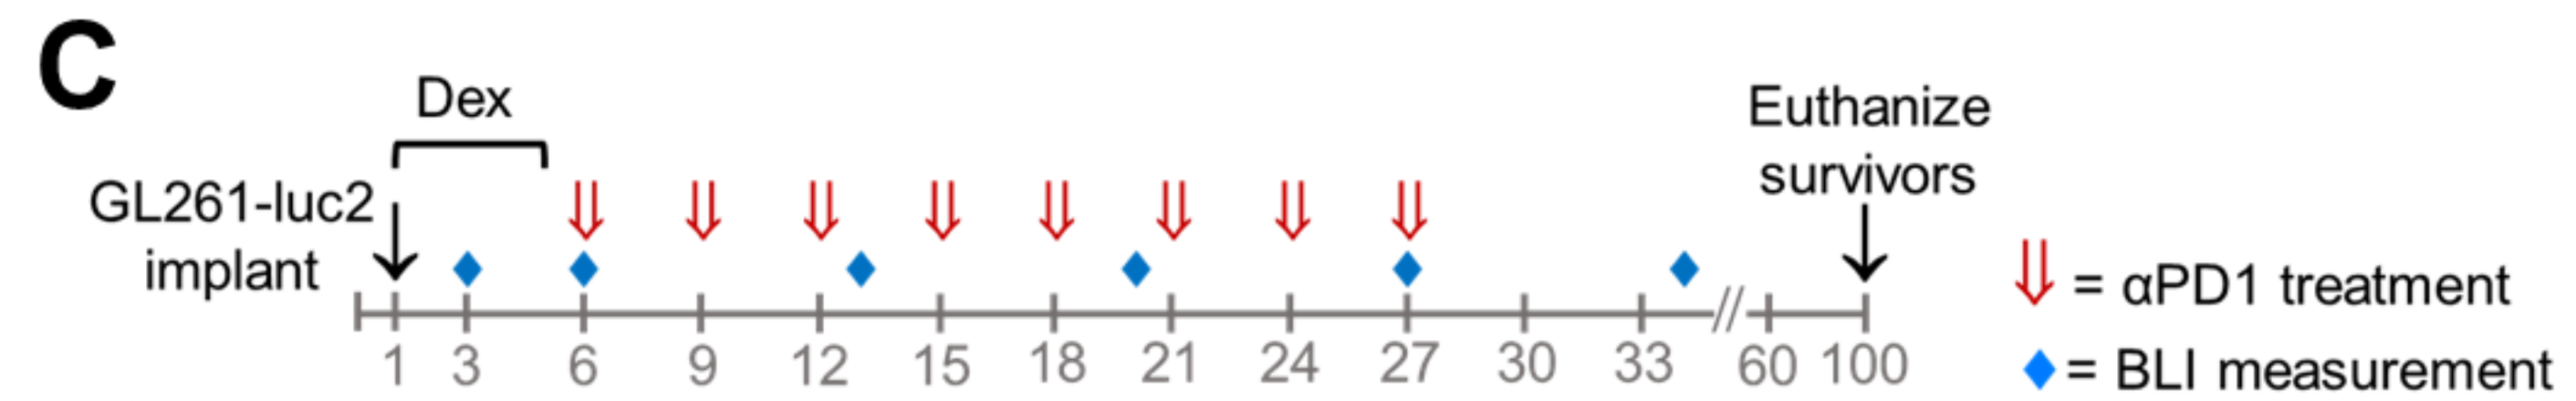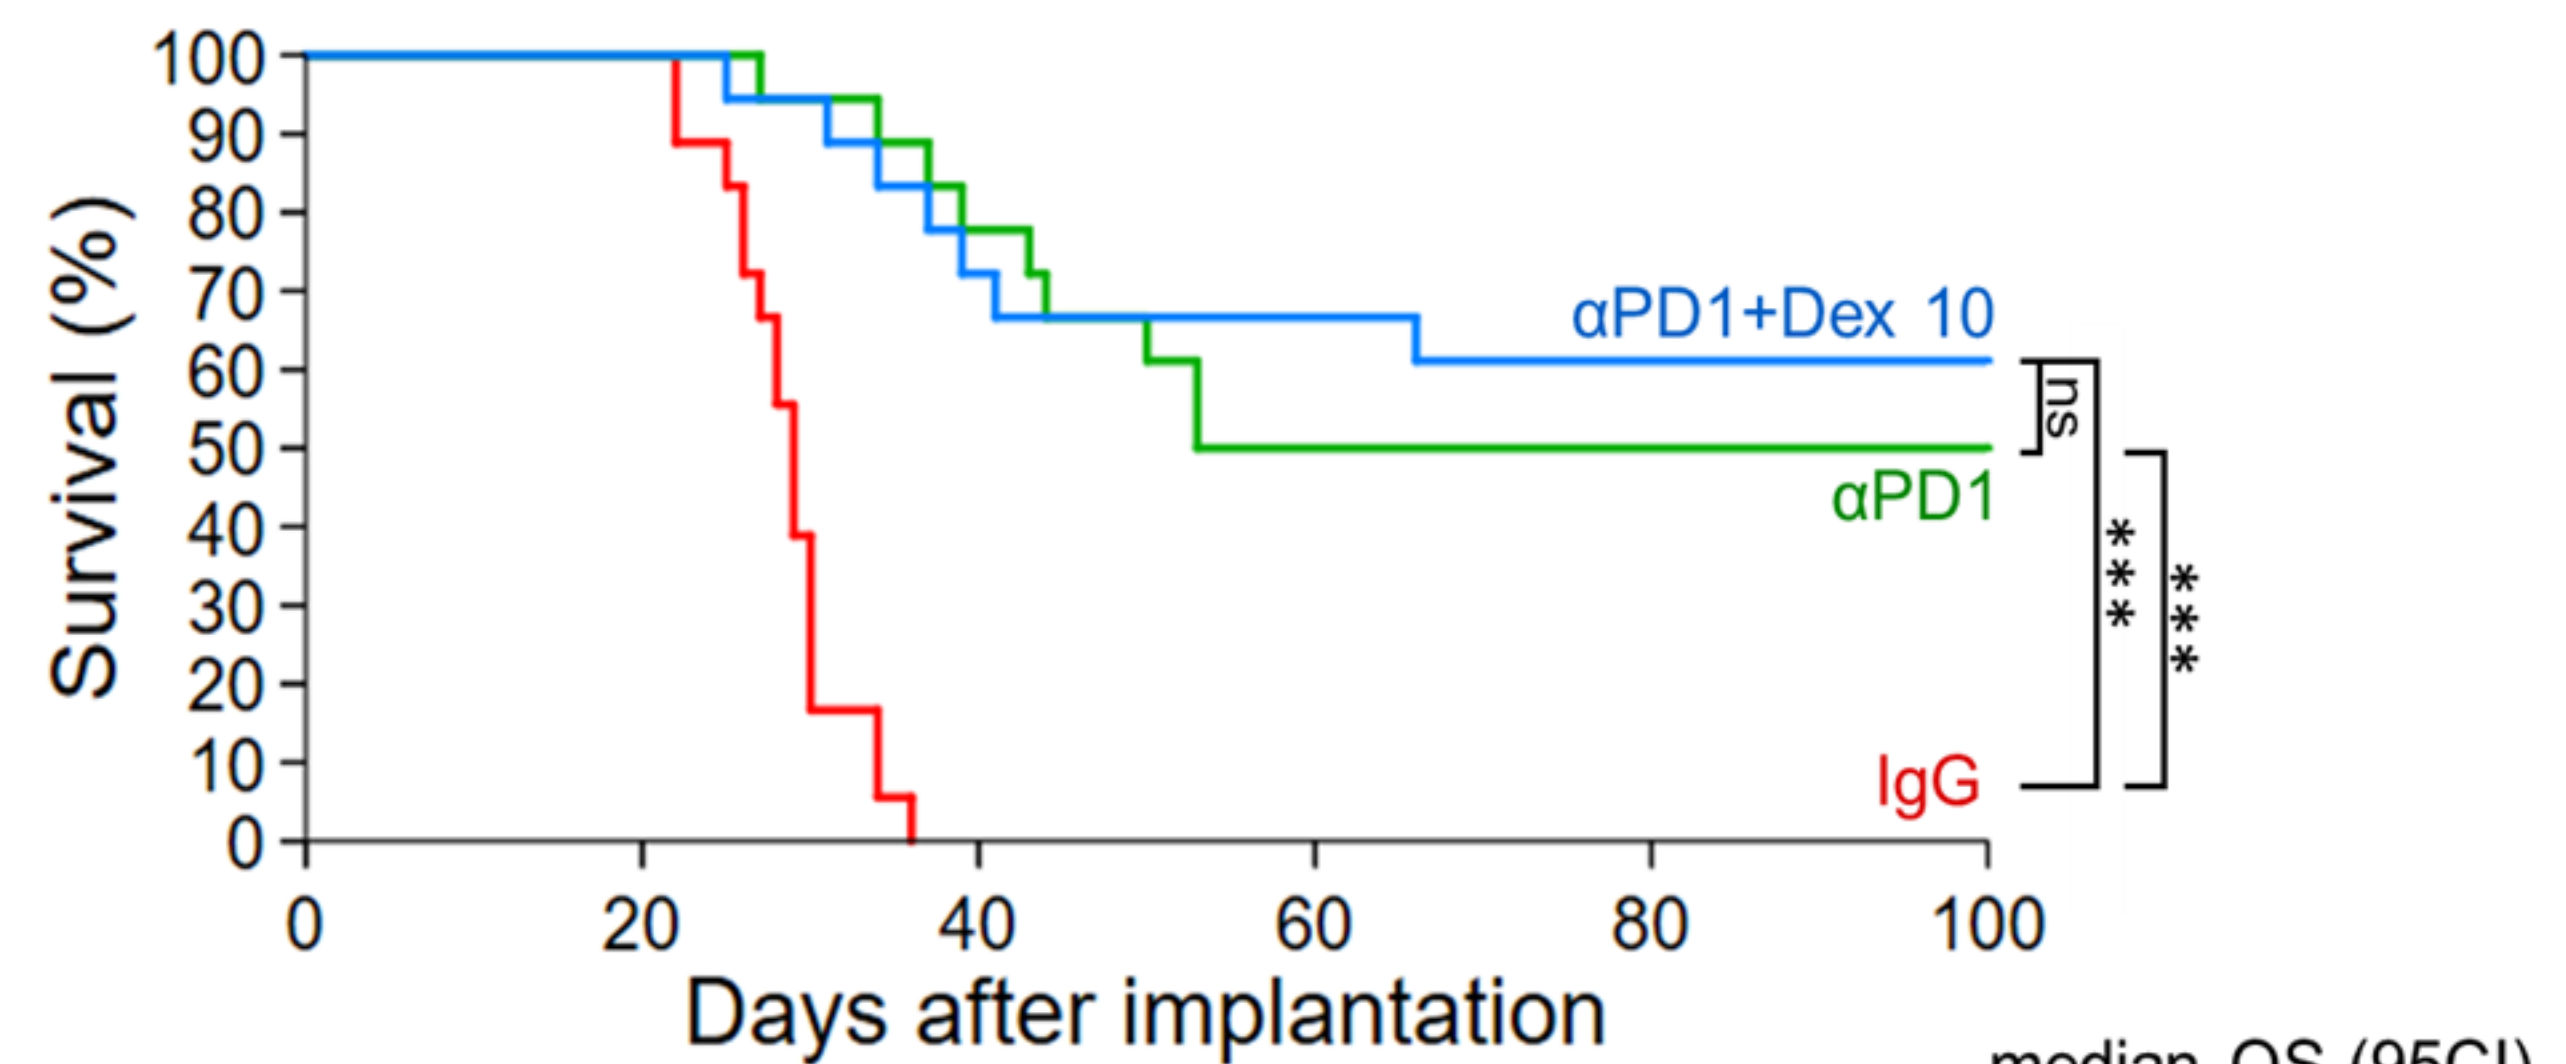

|             | 18 | 18 | 0  | 0  | 0  | 0  | 29 (26-30) |
|-------------|----|----|----|----|----|----|------------|
| IgG         | 18 | 18 | 0  | 0  | 0  | 0  | 29 (26-30) |
| αPD1        | 18 | 18 | 14 | 9  | 9  | 9  | 53 (43-NR) |
| αPD1+Dex 10 | 18 | 18 | 13 | 12 | 11 | 11 | NR         |

Supplement: NIHMS1638220-supplement-2.pdf [file NIHMS1638220-supplement-2.pdf]

**S3 A** ● CD4+ FOXP3+

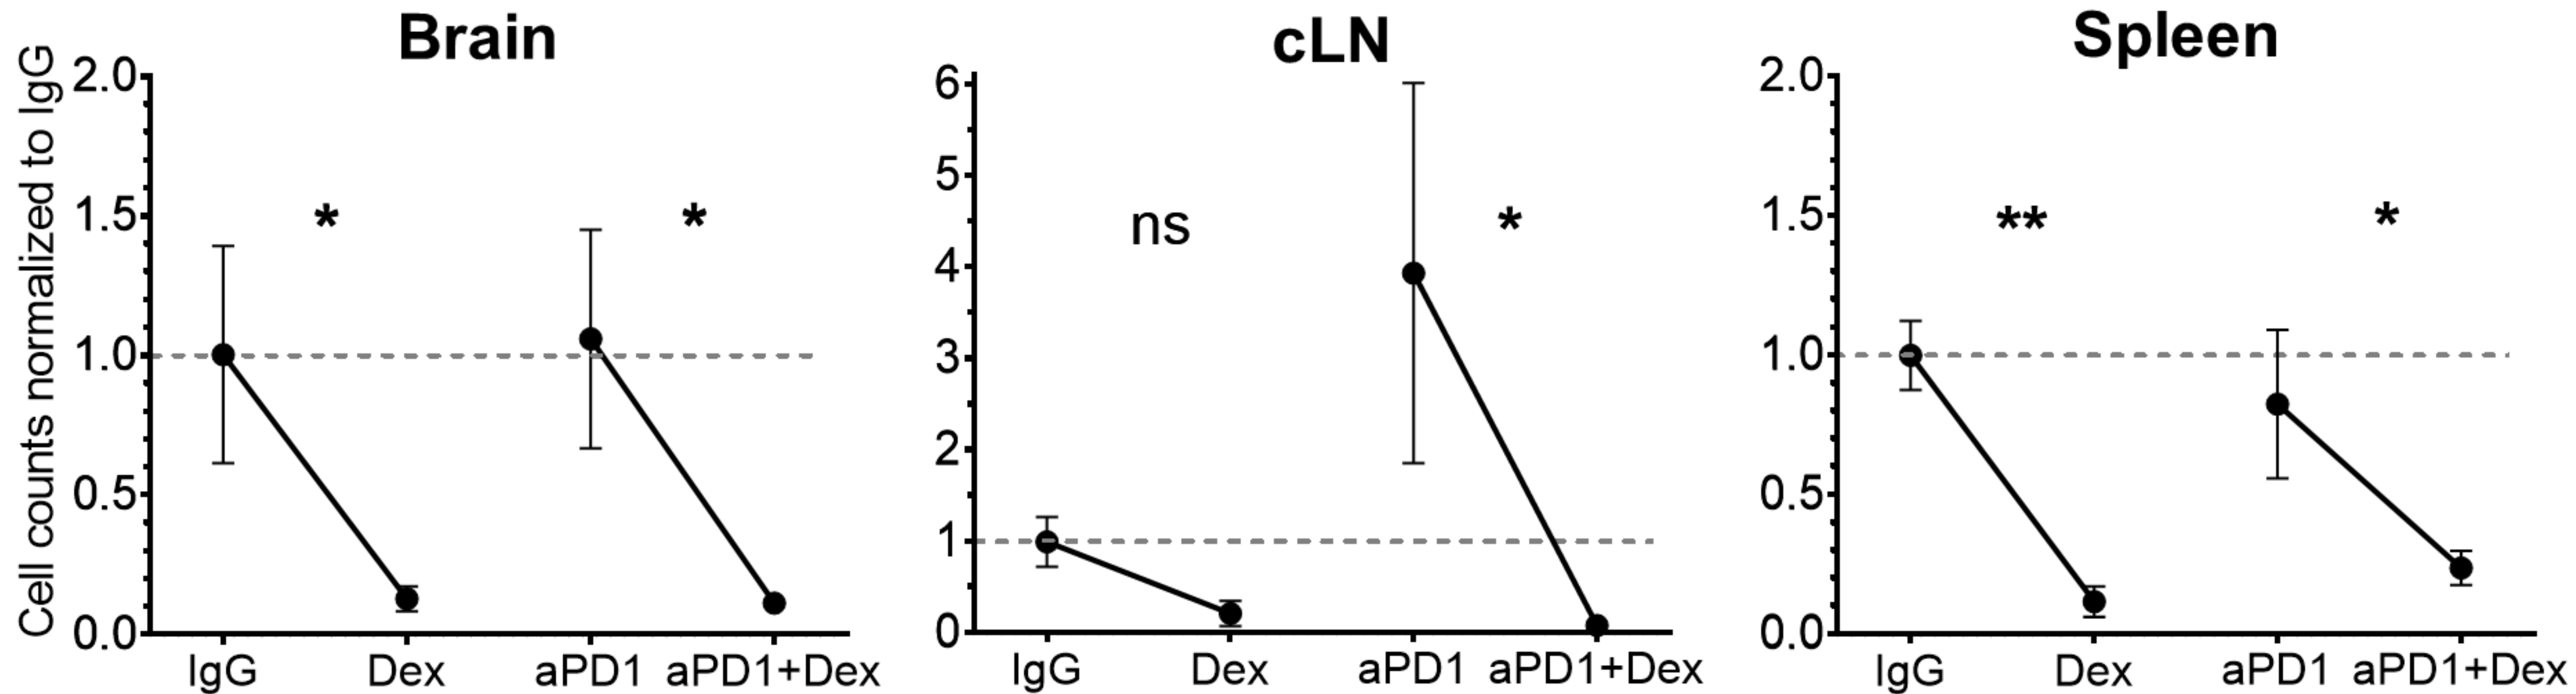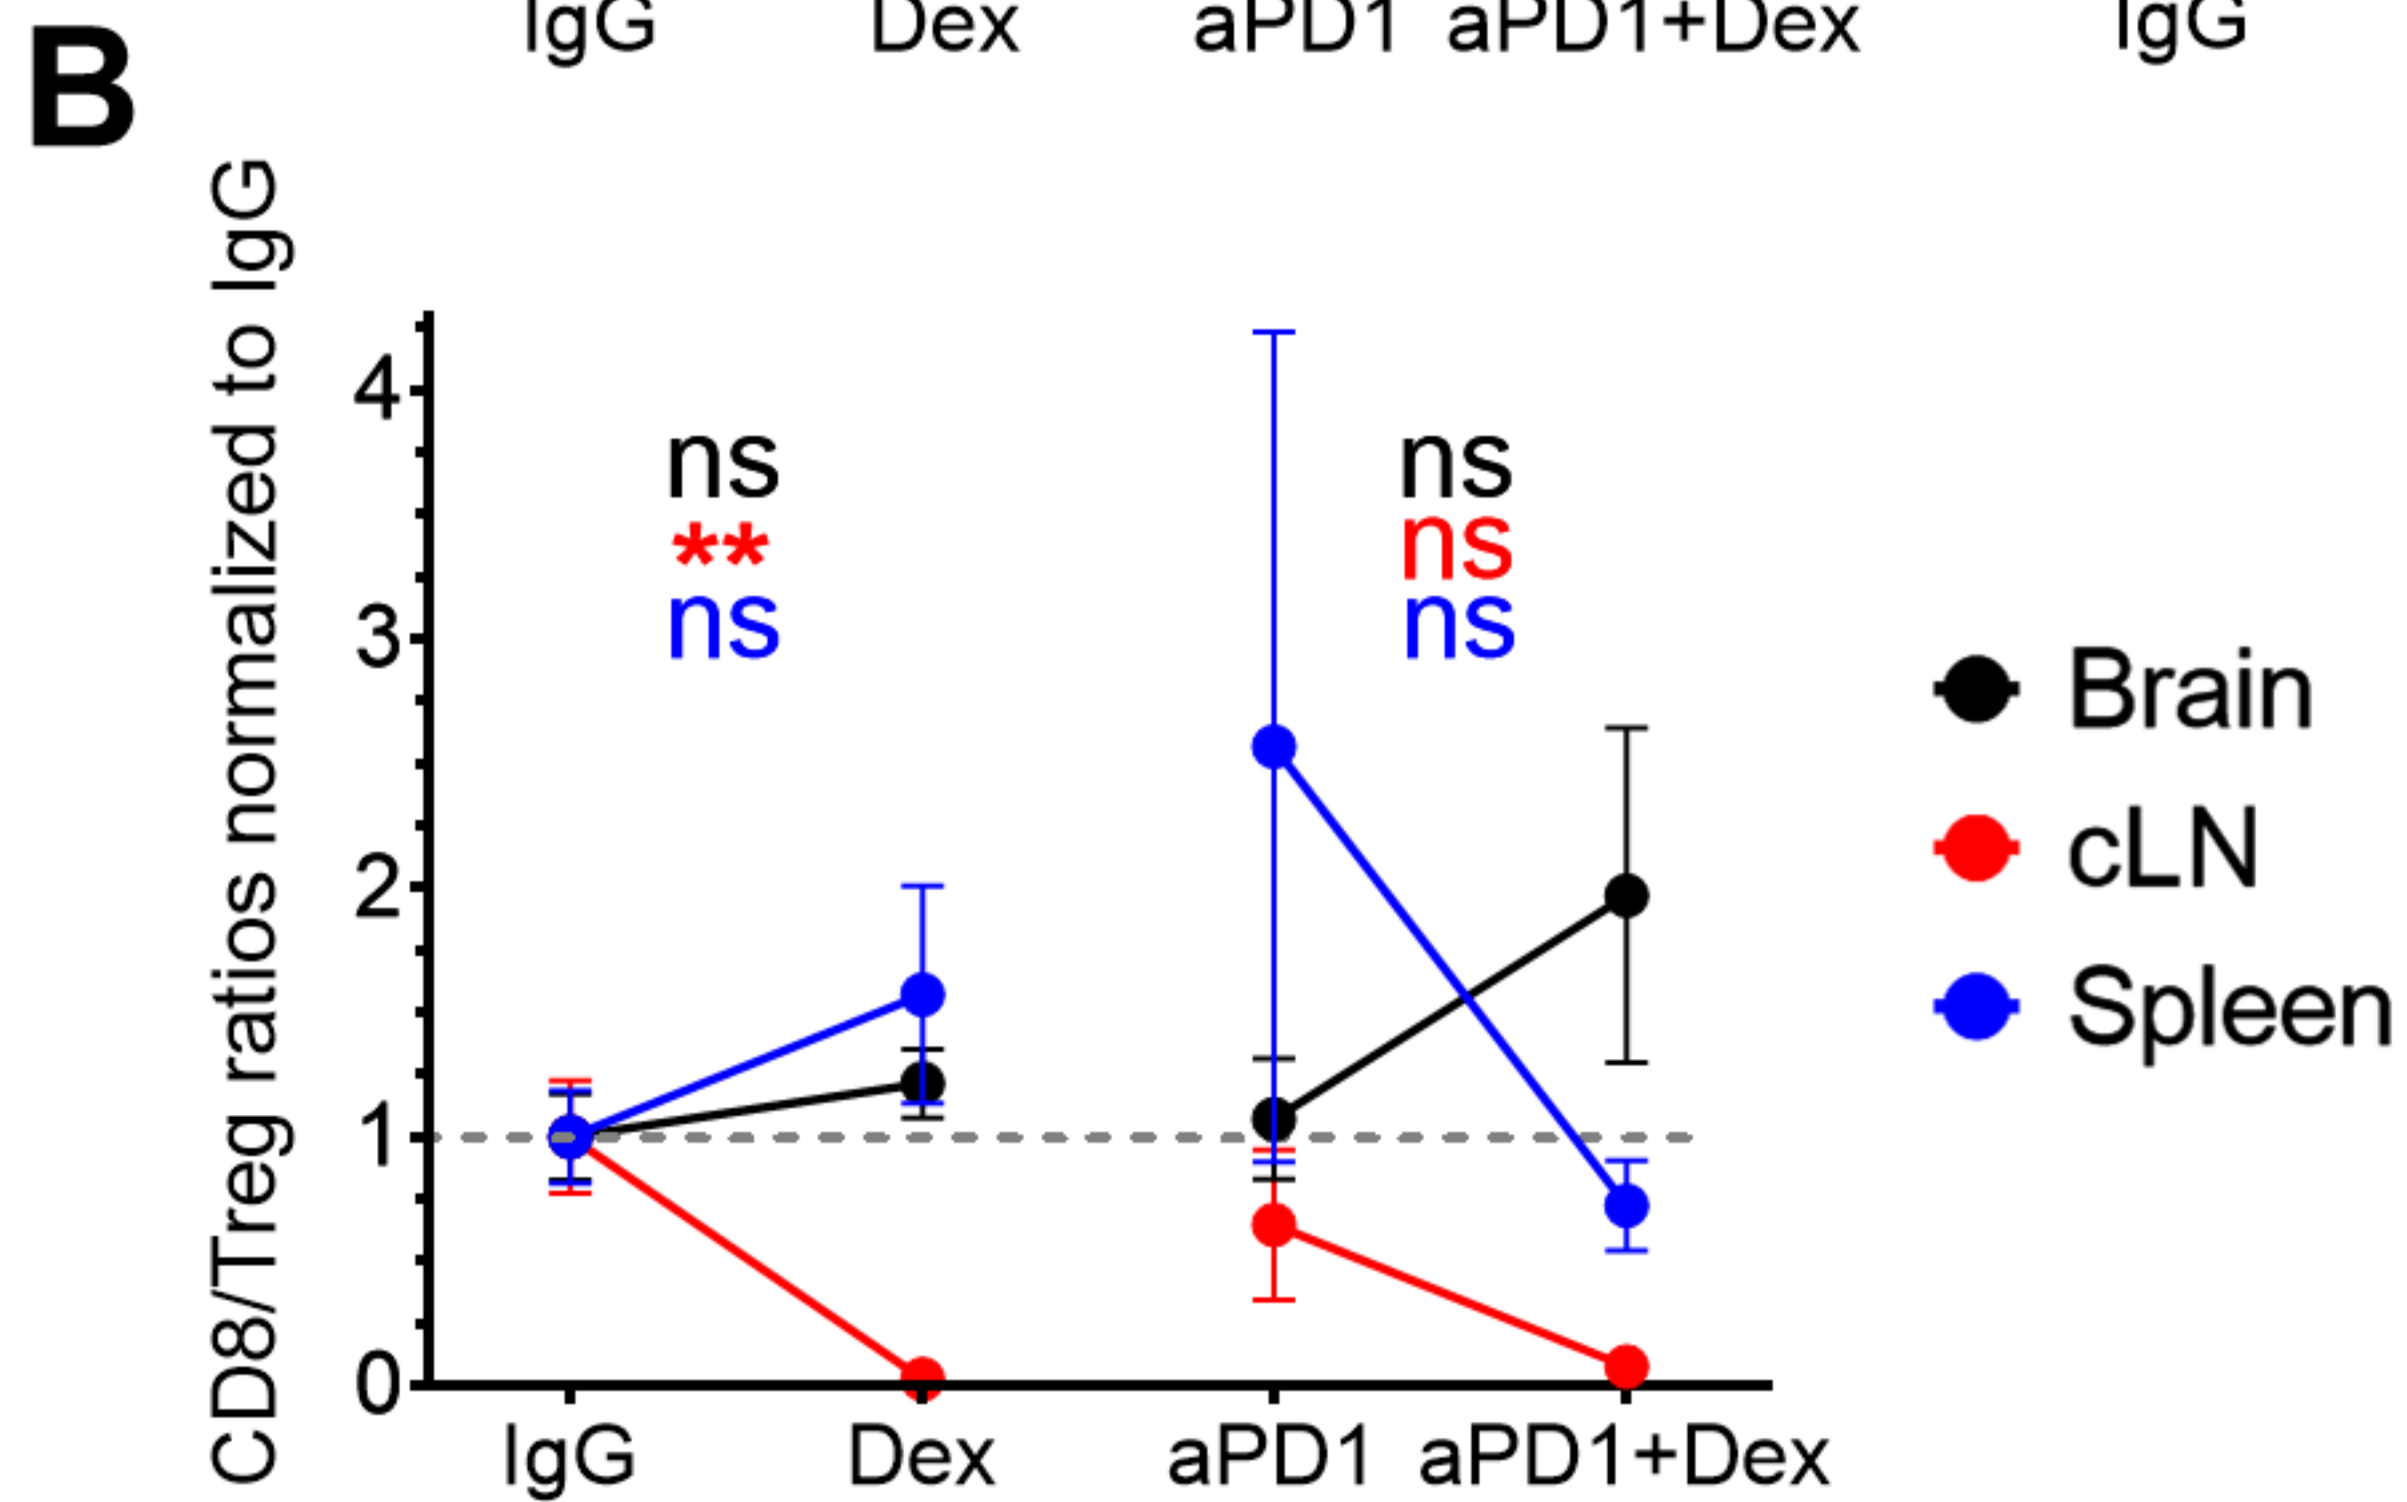

Supplement: NIHMS1638220-supplement-3.pdf [file NIHMS1638220-supplement-3.pdf]
